# Supplementary figures and images for: Effect of particle size on the slurry-based processability and conductivity of t -Li 7 SiPS 8
Source: Royal Society of Chemistry journal article supplement (doi:10.1039/d5eb00005j), 2025-01-01

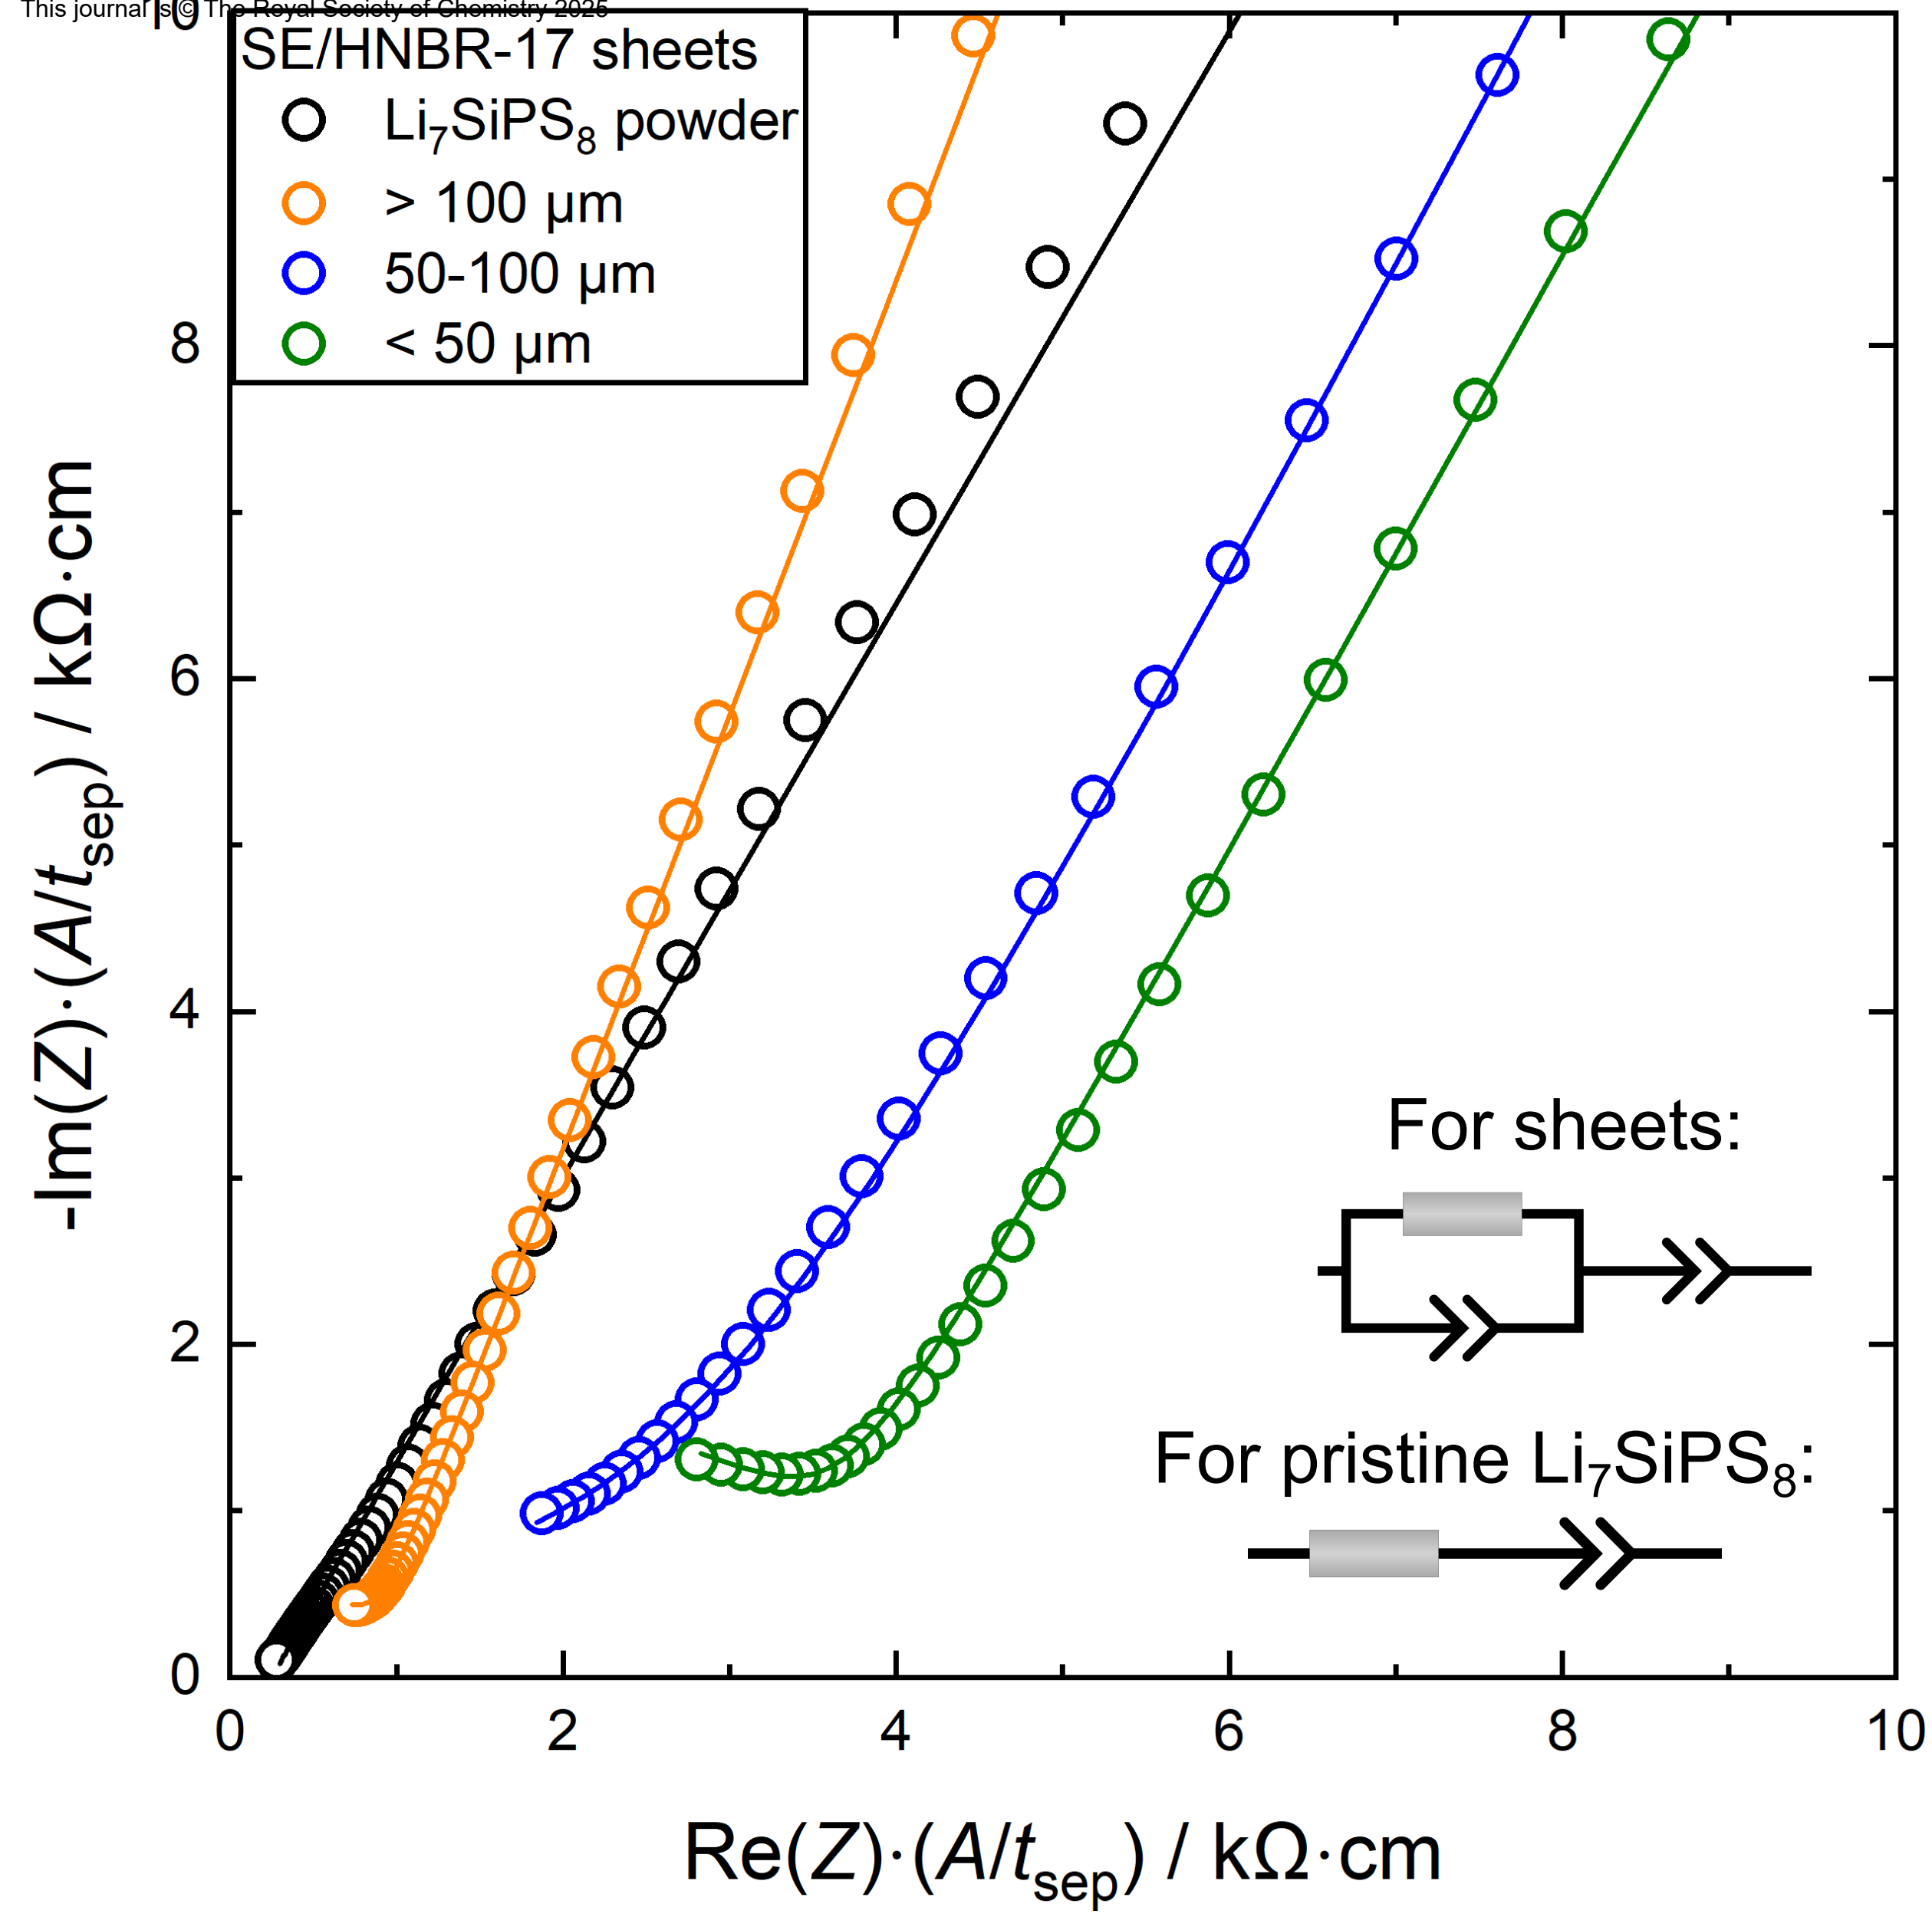

Supplement: d5eb00005j5.pdf [file d5eb00005j5.pdf]
